# Supplementary material
Source: Research Square preprint supplement (doi:10.21203/rs.3.rs-9762903/v1)
Supplement: Supplementary file 1 [file 4e18587b11eb1237de5700b7.docx]

**Appendix A. Causal Relationships and Potential Biasing Pathways Affecting the Association Between Job Strain and Breast Cancer**

**
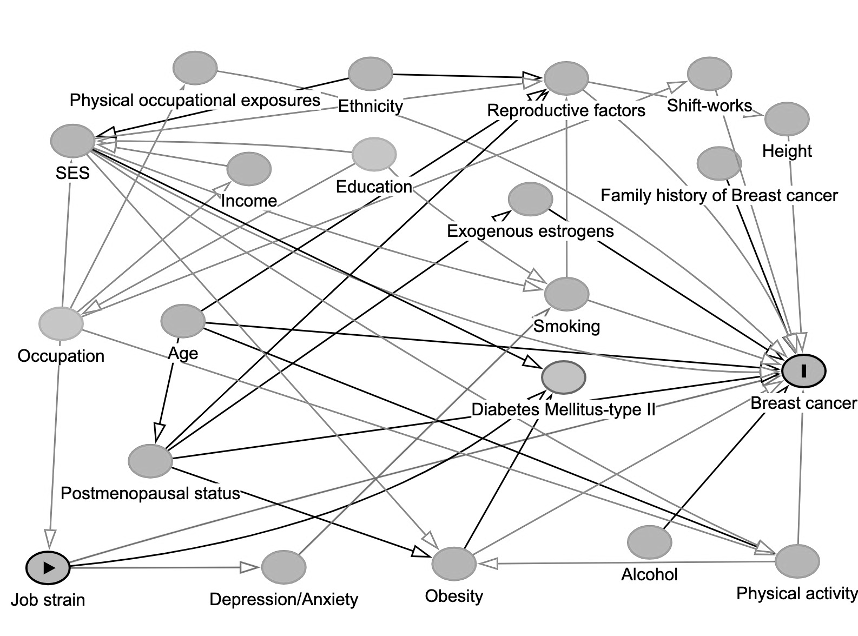
**
