# Supplementary material
Source: Research Square preprint supplement (doi:10.21203/rs.3.rs-9762903/v1)
Supplement: Supplementary file 2 [file e320ba313399d15294951843.docx]

Supplementary Table 1 Age-Adjusted and Minimally Adjusted Incidence Rate Ratio (IRR) of Breast Cancer Associated with Exposure to Job Strain According to Different Job Strain Parameterizations

| **Job strain** | **Controls**  **(n=784)** | **Cases**  **(n=196)** | **Age-Adjusted IRR (95% CI)** | **Minimally Adjusteda IRR (95% CI)** |
| --- | --- | --- | --- | --- |
| **Continuous Representation** | **Mean (SD)** | **Mean (SD)** |  |  |
| Job Strain Scoreb | 0.88 (0.26) | 0.84 (0.24) | 0.56 (0.28-1.05) | 0.60 (0.30-1.15) |
| **Quartile-based Dichotomous** | n (%) | n (%) |  |  |
| Non-Exposedc | 667 (85.1) | 175 (89.3) | 1.00 (Ref) | 1.00 (Ref) |
| Exposedd | 117 (14.9) | 21 (10.7) | 0.68 (0.41-1.10) | 0.71 (0.42-1.15) |

a Adjusted for age at diagnosis, ethnicity (White, Asian, Black African, Arab, Latino and Other), education level (high school or less, college, university), income level ($49,999 or less, $50,000-$74,999, $75,000 and up), physical activity (MET-hours/week), shift work (day, night and rotating, other), and occupational exposures (yes/no)

b Per one-unit increase in job strain score

c Non-exposed = lower three quartiles (Q1-Q3)

d Exposed = highest quartile (Q4) of the job strain score

**Supplementary Table 2** Age-Adjusted and Minimally Adjusted Incidence Rate Ratio (IRR) of Breast Cancer Associated with Exposure to Job Strain (Continuous) in Presumed Menopausal Status, Education, and Income Level Strata

|  | | **Controls (n=784) Mean (SD)** | **Cases (n=196) Mean (SD)** | **Age-Adjusted IRRa (95% CI)** | **Minimally Adjustedb IRRa (95% CI)** |
| --- | --- | --- | --- | --- | --- |
| **Presumed Menopausal Status** | Premenopausal | 0.91 (0.33) | 0.79 (0.19) | 0.21 (0.03-1.11) | 0.30 (0.03-1.85) |
| Postmenopausal | 0.87 (0.25) | 0.85 (0.24) | 0.66 (0.32-1.32) | 0.71 (0.33-1.46) |
| **Education Level Strata** | High School and less | 0.92 (0.28) | 0.89 (0.23) | 0.67 (0.16-2.38) | 0.67 (0.16-2.45) |
| College | 0.90 (0.24) | 0.89 (0.29) | 0.86 (0.26-2.67) | 0.75 (0.26-2.40) |
| University | 0.84 (0.27) | 0.79 (0.19) | 0.42 (0.14-1.12) | 0.38 (0.12-1.06) |
| **Income Level Strata** | $49,999 and less | 0.92 (0.28) | 0.95 (0.32) | 1.51 (0.49-4.35) | 1.66 (0.51-5.00) |
| $50,000-$74,999 | 0.92 (0.29) | 0.82 (0.22) | 0.20 (0.04-0.87) | 0.26 (0.05-1.10) |
| $75,000 and up | 0.84 (0.23) | 0.80 (0.19) | 0.47 (0.17-1.26) | 0.47 (0.15-1.30) |

a IRRs represent the change in risk per one-unit increase in the job strain score

b Adjusted for age at diagnosis, ethnicity (White, Asian, Black African, Arab, Latino and Other), education level (high school or less, college, university), income level ($49,999 or less, $50,000-$74,999, $75,000 and up), physical activity (MET-hours/week), shift work (day, night and rotating, other), and occupational exposures (yes/no)

**Supplementary Table 3** Age-Adjusted and Minimally Adjusted Incidence Rate Ratio (IRR) of Breast Cancer Associated with Exposure to Job Strain (Quartile-Based Dichotomous) in Presumed Menopausal Status, Education, and Income Level Strata

|  | | **Job Strain (Quartile-Based Dichotomous)a** | **Controls (n=784)**  **n (%)** | **Cases (n=196)**  **n (%)** | **Age-Adjusted IRR (95% CI)** | **Minimally Adjustedb IRR (95% CI)** |
| --- | --- | --- | --- | --- | --- | --- |
| **Presumed Menopausal Status** | Premenopausal | Non-Exposed | 86 (80.4) | 24 (92.3) | 1.00 (Ref) | 1.00 (Ref) |
| Exposed | 21 (19.6) | 2 (7.7) | 0.34 (0.05-1.28) | 0.43 (0.06-1.73) |
| Postmenopausal | Non-Exposed | 581 (85.8) | 151 (88.8) | 1.00 (Ref) | 1.00 (Ref) |
| Exposed | 96 (14.2) | 19 (11.2) | 0.76 (0.44-1.26) | 0.80 (0.46-1.24) |
| **Education Level Strata** | High School and less | Non-Exposed | 123 (79.9) | 34 (82.9) | 1.00 (Ref) | 1.00 (Ref) |
| Exposed | 31 (20.1) | 7 (17.1) | 0.82 (0.31-1.93) | 0.81 (0.29-2.00) |
| College | Non-Exposed | 237 (83.2) | 48 (84.2) | 1.00 (Ref) | 1.00 (Ref) |
| Exposed | 48 (16.8) | 9 (15.8) | 0.93 (0.40-1.94) | 0.85 (0.37-1.80) |
| University | Non-Exposed | 307 (89.0) | 93 (94.9) | 1.00 (Ref) | 1.00 (Ref) |
| Exposed | 38 (11.0) | 5 (5.1) | 0.43 (0.15-1.04) | 0.39 (0.13-0.97) |
| **Income Level Strata** | $49,999 and less | Non-Exposed | 165 (80.9) | 30 (69.8) | 1.00 (Ref) | 1.00 (Ref) |
| Exposed | 39 (19.1) | 13 (30.2) | 1.83 (0.85-3.78) | 1.83 (0.83-3.78) |
| $50,000-$74,999 | Non-Exposed | 143 (83.6) | 40 (90.9) | 1.00 (Ref) | 1.00 (Ref) |
| Exposed | 28 (16.4) | 4 (9.1) | 0.51 (0.14-1.40) | 0.51 (0.14-1.44) |
| $75,000 and up | Non-Exposed | 359 (87.8) | 105 (96.3) | 1.00 (Ref) | 1.00 (Ref) |
| Exposed | 50 (12.2) | 4 (3.7) | 0.27 (0.08-0.69) | 0.26 (0.07-0.68) |

a Exposed = participants in the highest quartile (Q4); Non-exposed = participants in the lower three quartiles (Q1-Q3)

b Adjusted for age at diagnosis, ethnicity (White, Asian, Black African, Arab, Latino and Other), education level (high school or less, college, university), income level ($49,999 or less, $50,000-$74,999, $75,000 and up), physical activity (MET-hours/week), shift work (day, night and rotating, other), and occupational exposures (yes/no)
